# Supplementary material
Source: Springer Nature journal article supplement (https://www.springermedizin.de/resource/supplementary/12990_2009_246_MOESM1_ESM.pdf/9612878)

**A**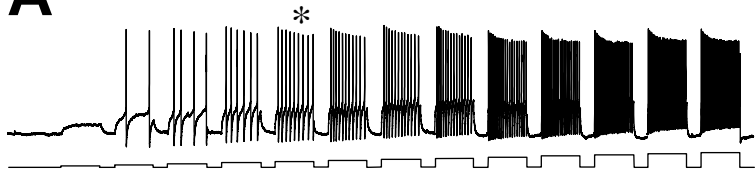

Repetitive (R)

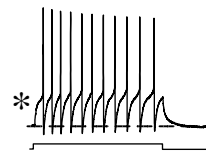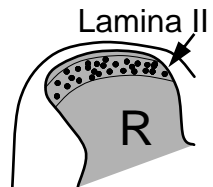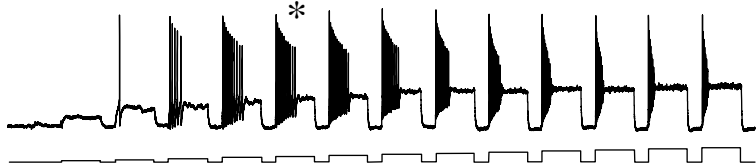

Phasic (P)

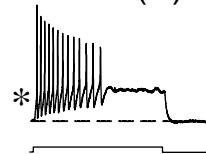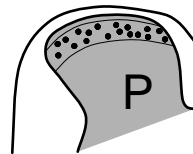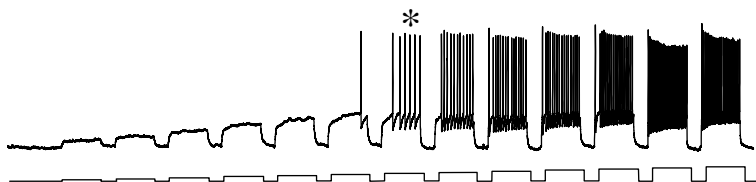

Delayed (D)

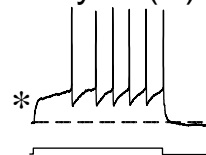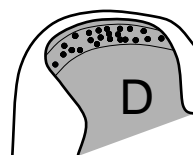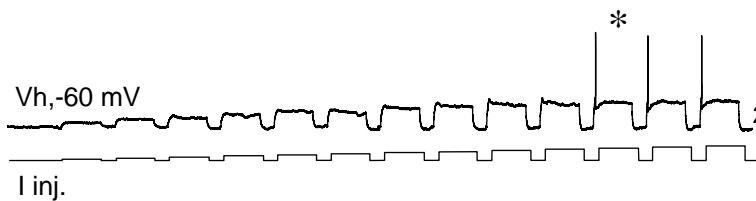

Single (S)

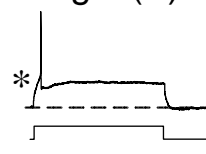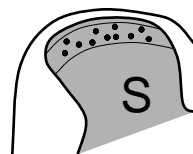**B**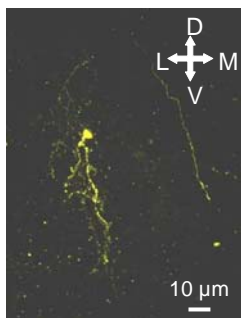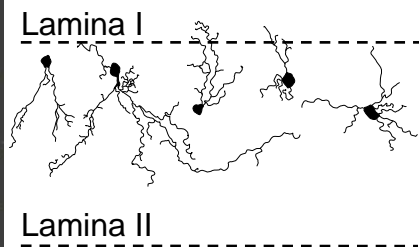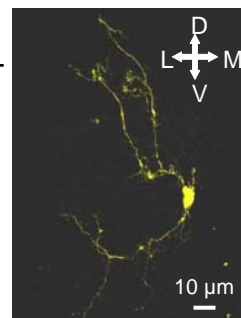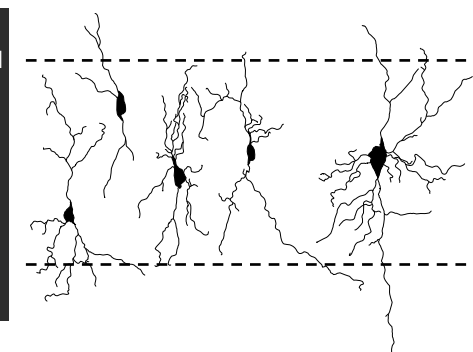

Supplement: MOESM1 [file 9612878]
